# Supplementary material for: TCDO: A Community-Based Ontology for Integrative Representation and Analysis of Traditional Chinese Drugs and Their Properties
Source: Hindawi journal article supplement (doi:10.1155/2021/6637810), 2021-09-23
Supplement: f1 [file 6637810.f1.pdf]

| term name                      | term name in Chi | term ID      | text definition                                                                                                                                                                                                                                                                                                                         |
|--------------------------------|------------------|--------------|-----------------------------------------------------------------------------------------------------------------------------------------------------------------------------------------------------------------------------------------------------------------------------------------------------------------------------------------|
| traditional Chinese drug (TCD) | 传统中药             | TCDO_0000001 | A drug that is developed originally from ancient China. A TCD is a drug derived from the usage of medicinal material grown and                                                                                                                                                                                                          |
| decocting pieces               | 中药饮片             | TCDO_0000002 | A traditional Chinese drug that is prepared with crude medicine as raw materials. According to Chinese medicine theory, after processing, it can be directly used in traditional Chinese medicine clinical or pharmaceutical production and use of prescription drugs. It                                                               |
| Chinese patent drug            | 中成药              | TCDO_1000000 | A traditional Chinese drug that is modernized into a ready-to-use form, such as tablets, oral solutions, or dry suspensions.                                                                                                                                                                                                            |
| medicinal material             | 中药药材             | TCDO_1000068 | A material entity that is rude natural medicinal for processing and preparing traditional Chinese drugs. Medicinal materials are medicinal parts of medicinal plants, animals and minerals after preliminary processing, which are used as raw materials to make decoction pieces in Chinese medicines. It is also called Chinese crude |
| TCD nature                     | 中药药性             | TCDO_0000063 | A function of TCD that induces cold and heat changes in the body according to the cold or heat property of the diseases treated based on                                                                                                                                                                                                |
| TCD flavor                     | 中药药味             | TCDO_0000064 | A flavor that reflects the common function of decocting pieces in highly concentrated and abstracted way.                                                                                                                                                                                                                               |
| channel tropism                | 归经               | TCDO_0000062 | A disposition that the TCD tends to have therapeutic effects on the pathological changes in one or several certain channels. It is also                                                                                                                                                                                                 |
| TCD toxicity                   | 中药毒性             | TCDO_0000065 | A quality that represents the level of critical or lethal reaction to a dosage of a TCD drug medication.                                                                                                                                                                                                                                |
